# Supplementary material
Source: PubMed Central journal article supplement (PMC3741618)
Supplement: NIHMS464481-supplement-supplement_1.pdf [file NIHMS464481-supplement-supplement_1.pdf]

**Supplementary Table 1 Current sample detailed information**

| Species                         | collection      | code        | sex | age    | body mass (kg) | plane of section | section thickness (µm) |
|---------------------------------|-----------------|-------------|-----|--------|----------------|------------------|------------------------|
| <b>HOMINOIDEA</b>               |                 |             |     |        |                |                  |                        |
| <i>Homo sapiens</i>             | Zilles          | 14686       | M   | 37     | NA             | coronal          | 20                     |
| <i>Homo sapiens</i>             | Zilles          | 1696        | M   | 54     | NA             | coronal          | 20                     |
| <i>Homo sapiens</i>             | Zilles          | 18992       | M   | 56     | NA             | coronal          | 20                     |
| <i>Homo sapiens</i>             | Zilles          | 20784       | M   | 75     | NA             | coronal          | 20                     |
| <i>Homo sapiens</i>             | Zilles          | 28193       | M   | 69     | NA             | coronal          | 20                     |
| <i>Homo sapiens</i>             | Zilles          | 295         | F   | 85     | NA             | coronal          | 20                     |
| <i>Homo sapiens</i>             | Zilles          | SN382/81    | F   | 59     | 61.4           | coronal          | 20                     |
| <i>Homo sapiens</i>             | Zilles          | 54491       | F   | 79     | NA             | coronal          | 20                     |
| <i>Homo sapiens</i>             | Zilles          | 5694        | F   | 72     | NA             | coronal          | 20                     |
| <i>Homo sapiens</i>             | Zilles          | 6895        | F   | 79     | NA             | coronal          | 20                     |
| <i>Pan troglodytes</i> ‡‡       | Zilles          | 1548        | NA  | NA     | NA             | coronal          | 20                     |
| <i>Pan troglodytes</i>          | Zilles          | 4/97        | F   | 24     | 80.00          | coronal          | 20                     |
| <i>Pan troglodytes</i>          | Zilles          | Schimp 1    | F   | 22     | 50.00          | coronal          | 20                     |
| <i>Pan troglodytes</i>          | Zilles          | YN89-278    | M   | 22     | 53.00          | horizontal       | 20                     |
| <i>Pan troglodytes</i> ‡‡       | Yakovlev-Haleen | 3.1.1.0.1   | F   | NA     | 6.80           | sagittal         | 35                     |
| <i>Pan troglodytes</i> ‡‡       | Yakovlev-Haleen | 3.1.1.0.3   | M   | 6 or 7 | 20.41          | sagittal         | 35                     |
| <i>Pan paniscus</i>             | Zilles          | YN86-137    | F   | 2      | 10.40          | coronal          | 20                     |
| <i>Pan paniscus</i> ††          | Zilles          | 1/97        | F   | 11     | NA             | coronal          | 20                     |
| <i>Pan paniscus</i>             | GWU             | MCZ-2007-52 | F   | 25     | NA             | coronal          | 40                     |
| <i>Gorilla gorilla</i>          | Zilles          | YN82-140    | F   | 20     | 84.70          | coronal          | 20                     |
| <i>Gorilla gorilla</i> ††       | Stephan         | A375        | M   | JUV    | 22.00          | coronal          | 20                     |
| <i>Pongo pygmaeus</i>           | Zilles          | 2/97        | M   | 37     | 114.00         | coronal          | 20                     |
| <i>Pongo pygmaeus</i>           | Zilles          | YN85-38     | M   | 17     | 58.00          | coronal          | 20                     |
| <i>Pongo pygmaeus</i>           | Zilles          | 5/97        | M   | 34     | 140.00         | coronal          | 20                     |
| <i>Pongo pygmaeus</i>           | Zilles          | 0459        | F   | A      | NA             | coronal          |                        |
| <i>Pongo pygmaeus</i>           | GWU             | 100344      | M   | 39     | NA             | coronal          | 40                     |
| <i>Hylobates lar</i>            | Zilles          | YN81-146    | F   | A      | 4.00           | coronal          | 20                     |
| <i>Hylobates lar</i>            | Zilles          | 3/97        | F   | 22     | 6.80           | coronal          | 20                     |
| <i>Hylobates muelleri</i>       | GWU             | 970431      | M   | 18.6   | 9.16257        | coronal          | 40                     |
| <i>Symphalangus syndactylus</i> | GWU             | 880804      | M   | 33     | 7.26           | coronal          | 40                     |
| <b>CERCOPITHECOIDEA</b>         |                 |             |     |        |                |                  |                        |
| <b>CERCOPITHECINAE</b>          |                 |             |     |        |                |                  |                        |
| <i>Cercopithecus ascanius</i>   | Stephan         | 219         | F   | A      | 3.3            | coronal          | 20                     |
| <i>Cercopithecus mitis</i>      | GWU             | 201202      | M   | A      | NA             | coronal          | 40                     |
| <i>Cercopithecus mitis</i>      | Stephan         | 261         | M   | A      | 7.00           | coronal          | 20                     |
| <i>Erythrocebus patas</i>       | Stephan         | 1340        | F   | A      | 5.80           | coronal          | 20                     |

|                             |         |        |    |    |       |            |    |
|-----------------------------|---------|--------|----|----|-------|------------|----|
| <i>Lophocebus albigena</i>  | Stephan | 242    | M  | A  | 9.25  | coronal    | 20 |
| <i>Macaca fascicularis</i>  | Zilles  | ma22   | M  | 3  | 2.90  | coronal    | 20 |
| <i>Macaca mulatta</i> §§    | Stephan | 476    | NA | NA | NA    | coronal    | 20 |
| <i>Macaca mulatta</i> §§    | Zilles  | mm4    | NA | A  | 2.90  | horizontal | 20 |
| <i>Miopithecus talapoin</i> | Stephan | 1171   | M  | A  | 1.38  | coronal    | 20 |
| <i>Papio anubis</i>         | Stephan | 251    | M  | A  | 35.00 | coronal    | 20 |
| <i>Papio anubis</i>         | Stephan | 97     | F  | A  | 21.00 | coronal    | 20 |
| COLOBINAE                   |         |        |    |    |       |            |    |
| <i>Nasalis larvatus</i>     | Stephan | 1365   | F  | A  | NA    | coronal    | 20 |
| <i>Pygathrix nemaeus</i>    | Stephan | 1364   | F  | A  | 4.00  | coronal    | 20 |
| <i>Procolobus badius</i> ** | Stephan | 213    | F  | A  | 7.50  | coronal    | 20 |
| <i>Procolobus badius</i> ** | Stephan | 216    | F  | A  | 8.25  | coronal    | 20 |
| <i>Colobus angolensis</i>   | GWU     | M00652 | M  | 18 | NA    | coronal    | 40 |

\*Nissl stain (Ag, cresyl violet, or thionin) was preferred. Myelin and MR sections were only used in cases where Nissl stain was inadequate or missing.

†All measurements (brain, V1, and LGN) were taken on myelin-stained sections only.

‡Myelin sections were used to assist where Nissl (cresyl violet or thionin stain) stain was inadequate or missing. LGN was measured solely on high strength (7T) magnetic resonance scans taken on the brain before preparation on cresyl violet stained sections, with MR sections used to correct for missing sections.

\*\*the LGN vol. is the published average for 213 and 216, duplicated for each specimen, as the individual values were missing.

††Juveniles omitted from analyses

‡‡Missing brain weights - omitted from analyses

§§Combined complimentary data from both *M. mulatta* specimens in analyses

| stain*         | brain mass (g) | corrected brain volume (cm <sup>3</sup> ) | LGN vol. (cm <sup>3</sup> ) | LGN volume source   | number of parvocellular layers and leaflets | subleafletin g/ subsidiary |
|----------------|----------------|-------------------------------------------|-----------------------------|---------------------|---------------------------------------------|----------------------------|
| Ag             | 1437.00        | 1387.07                                   | 0.377                       | de Sousa et al. 201 | 4 leaflets                                  |                            |
| Ag             | 1757.00        | 1695.95                                   | 0.538                       | de Sousa et al. 201 | 4 leaflets                                  |                            |
| Ag             | 1270.00        | 1225.87                                   | 0.340                       | de Sousa et al. 201 | 4 leaflets                                  |                            |
| Ag             | 1349.00        | 1302.12                                   | 0.340                       | de Sousa et al. 201 | 4 leaflets                                  | Y                          |
| Ag             | 1360.00        | 1312.74                                   | 0.336                       | de Sousa et al. 201 | 4 leaflets                                  |                            |
| Ag             | 1046.00        | 1009.65                                   | 0.209                       | de Sousa et al. 201 | 4 leaflets                                  |                            |
| Ag             | 1142.00        | 1102.32                                   | 0.272                       | de Sousa et al. 201 | 4 leaflets                                  |                            |
| Ag             | 1350.00        | 1303.09                                   | 0.371                       | de Sousa et al. 201 | 4 leaflets                                  |                            |
| Ag             | 1216.00        | 1173.75                                   | 0.254                       | de Sousa et al. 201 | 4 leaflets                                  |                            |
| Ag             | 1110.00        | 1071.43                                   | 0.313                       | de Sousa et al. 201 | 4 leaflets                                  |                            |
| Ag             | NA             | 264.99                                    | 0.172                       | de Sousa et al. 201 | 4 leaflets                                  |                            |
| Ag             | 359.50         | 347.01                                    | 0.336                       | de Sousa et al. 201 | 4 leaflets                                  |                            |
| Ag             | 440.00         | 424.71                                    | 0.349                       | de Sousa et al. 201 | 4 leaflets                                  |                            |
| Ag             | 420.00         | 405.41                                    | 0.345                       | de Sousa et al. 201 | 4 leaflets                                  |                            |
| myelin†        | NA             | 261.11                                    | 0.142                       | de Sousa et al. 201 | 4 leaflets                                  |                            |
| Nissl‡         | NA             | 276.81                                    | 0.160                       | de Sousa et al. 201 | 4 leaflets                                  |                            |
| Ag             | 392.00         | 378.38                                    | 0.306                       | de Sousa et al. 201 | 4 leaflets                                  |                            |
| Ag             | 324.00         | 312.74                                    | 0.261                       | de Sousa et al. 201 | 4 leaflets                                  | Y                          |
| cresyl violet§ | 337.00         | 325.29                                    | 0.259                       | de Sousa et al. 201 | 4 leaflets                                  |                            |
| Ag             | 376.00         | 362.93                                    | 0.300                       | de Sousa et al. 201 | 4 leaflets                                  |                            |
| cresyl violet  | 450.00         | 434.36                                    | 0.317                       | de Sousa et al. 201 | 4 leaflets                                  |                            |
| Ag             | 440.00         | 424.71                                    | 0.274                       | de Sousa et al. 201 | 2 undivided layers                          |                            |
| Ag             | 369.00         | 356.18                                    | 0.184                       | de Sousa et al. 201 | 2 undivided layers                          |                            |
| Ag             | 345.00         | 333.01                                    | 0.319                       | de Sousa et al. 201 | 2 undivided layers                          |                            |
| cresyl violet  | 190.00         | 183.40                                    | NA                          | NA                  | 2 undivided layers                          |                            |
| cresyl violet  | 397.80         | 383.98                                    | NA                          | NA                  | 2 undivided layers                          |                            |
| Ag             | 92.00          | 88.80                                     | 0.153                       | de Sousa et al. 201 | 2 undivided layers                          |                            |
| Ag             | 120.00         | 115.83                                    | 0.179                       | de Sousa et al. 201 | 2 undivided layers                          |                            |
| cresyl violet  | 101.80         | 98.26                                     | 0.162                       | this study          | 2 undivided layers                          |                            |
| cresyl violet  | 138.70         | 133.88                                    | NA                          | NA                  | 2 undivided layers                          |                            |
| cresyl violet  | 61.50          | 59.36                                     | 0.147                       | Stephan et al. 1984 | 4 leaflets                                  |                            |
| cresyl violet  | 71.60          | 69.11                                     | 0.184                       | this study          | 4 leaflets                                  |                            |
| cresyl violet  | 75.00          | 72.39                                     | 0.150                       | Stephan et al. 1984 | 4 leaflets                                  | Y                          |
| cresyl violet  | 94.20          | 90.93                                     | 0.267                       | this study          | 4 leaflets                                  | Y                          |

|               |        |        |       |                     |                    |   |
|---------------|--------|--------|-------|---------------------|--------------------|---|
| cresyl violet | 110.50 | 106.66 | 0.182 | Stephan et al. 1984 | 4 leaflets         |   |
| Ag            | 57.60  | 55.60  | 0.092 | de Sousa et al. 201 | 4 leaflets         |   |
| cresyl violet | 78.00  | 75.29  | 0.158 | Stephan et al. 1984 | NA                 |   |
| Ag            | NA     | 55.60  | NA    | this study          | 4 leaflets         | Y |
| cresyl violet | 41.10  | 39.67  | 0.109 | Stephan et al. 1984 | 4 leaflets         |   |
| cresyl violet | 222.00 | 214.29 | 0.395 | Stephan et al. 1984 | 4 leaflets         |   |
| cresyl violet | 191.00 | 184.36 | NA    | NA                  | NA                 |   |
| cresyl violet | 64.25  | 62.02  | 0.157 | this study          | 4 leaflets         |   |
| cresyl violet | 69.00  | 66.60  | 0.115 | this study          | 2 undivided layers |   |
| cresyl violet | 78.70  | 75.97  | 0.128 | Stephan et al. 1984 | 2 undivided layers |   |
| cresyl violet | 75.00  | 72.39  | 0.128 | Stephan et al. 1984 | 2 undivided layers |   |
| cresyl violet | 74.4   | 71.81  | 0.103 | this study          | 4 leaflets         |   |

uses of poor Nissl stain, as noted.

· missing.

rocessing. V1 was measured

al volumes are no longer available.

---

**Supplementary Table 2. Regression of LGN volume as a function of brain volume.**

---

| <b>Regression</b>        | slope | R2    | Lower<br>95% CI | Upper<br>95% CI | <i>p</i> | intercept | n  |
|--------------------------|-------|-------|-----------------|-----------------|----------|-----------|----|
| species mean LS          | 0.406 | ##### | 0.267           | 0.545           | 0.000    | -1.590    | 19 |
| independent contrasts LS | 0.489 | ##### | 0.241           | 0.738           | 0.000    | -1.785    | 18 |
| species mean RMA         | 0.489 | ##### | 0.369           | 0.647           | 0.000    | -1.765    | 19 |

---
